# Supplementary material for: The relationship between transmission time and clustering methods in Mycobacterium tuberculosis epidemiology
Source: PubMed Central journal article supplement (PMC6284411; doi:10.1016/j.ebiom.2018.10.013), 2018-10-16
Supplement: mmc1.pdf [file mmc1.pdf]

## Supplementary material

### Convergence removal

For the classical genotyping methods (Spoligotyping and MIRU-VNTR), convergence of patterns can occur<sup>1,2</sup> resulting in incorrect clustering. Such patterns were removed based on inter-sub-lineage convergence across the phylogenetic tree. Firstly, the SNP alignment of all isolates was used as the basis for creating a maximum likelihood (ML) phylogeny. RAxML-NG version 0.5.1b<sup>3</sup> was used to reconstruct the phylogeny from this alignment using a GTR+GAMMA model of evolution, accounting for ascertainment bias<sup>4</sup> with the Stamatakis reconstituted DNA approach<sup>5</sup> and site repeat optimisation<sup>6</sup> with 20 different starting trees and 100 bootstraps. All subsequent topology visualisation was undertaken using GraPhlAn<sup>7</sup>. Mtbc lineage and sub-lineage numbering was then applied to all isolates based on the Coll SNP set<sup>8</sup>. If the same clustering pattern was observed in two different sub-lineages, with other patterns seen in-between on the tree, this was flagged as pattern convergence. For example, if isolates with the same Spoligotyping pattern appeared in lineage 4,1 and 4,6 with different patterns in-between, this was confirmed as a convergent pattern.

Convergent evolution was found to affect 39% (12) of Spoligotyping-based clusters and 16% (6) of the MIRU-VNTR clusters. Convergence-free versions of these methods (Spoligotyping, MIRU-VNTR and the combination of both) were then used as input to BEAST2 for divergence dating, as outlined in the main methods. Supplemental table 1 outlines their median transmission ages alongside the 95% HPD.

**Supplemental table 1: Clustering method overview with convergent patterns removed from classical methods.**

For each clustering method, the general features are outlined in the table. Median ages and 95% HPD ranges are based upon the BEAST-2 estimates of clade heights (see methods).

| <b>Method</b>           | <b>Strains in clusters</b> | <b>Number of clusters</b> | <b>Percent of strains in clusters</b> | <b>Cluster sizes</b> | <b>Maximum SNP distances</b> | <b>Clustering rate</b> | <b>Mean Timespan</b> | <b>Timespan 95% HPD</b> |
|-------------------------|----------------------------|---------------------------|---------------------------------------|----------------------|------------------------------|------------------------|----------------------|-------------------------|
| Spoligotyping           | 118                        | 21                        | 36.42                                 | 2-28                 | 0-189                        | 0.2994                 | 76.51                | 0.81 - 823.21           |
| MIRU-VNTR               | 121                        | 32                        | 37.35                                 | 2-11                 | 0-48                         | 0.2747                 | 26.08                | 0 - 162.27              |
| Spoligotyping-MIRU-VNTR | 50                         | 12                        | 15.43                                 | 2-10                 | 2-48                         | 0.1173                 | 32.92                | 0.8 - 216.31            |
| 1 SNP cluster           | 74                         | 29                        | 22.84                                 | 2-6                  | 0-2                          | 0.1389                 | 3.91                 | 0 - 23.54               |
| 5 SNP cluster           | 147                        | 40                        | 45.37                                 | 2-27                 | 0-10                         | 0.3302                 | 10.86                | 0 - 47.07               |
| 12 SNP cluster          | 242                        | 47                        | 74.69                                 | 2-34                 | 0-23                         | 0.6019                 | 23.63                | 0 - 102.58              |
| 1 allele cgMLST         | 80                         | 31                        | 24.69                                 | 2-6                  | 0-4                          | 0.1512                 | 4.73                 | 0 - 24.65               |
| 5 allele cgMLST         | 173                        | 42                        | 53.4                                  | 2-28                 | 0-22                         | 0.4043                 | 13.4                 | 0 - 68.53               |
| 12 allele cgMLST        | 254                        | 45                        | 78.4                                  | 2-39                 | 0-51                         | 0.6451                 | 24.06                | 0 - 112.25              |

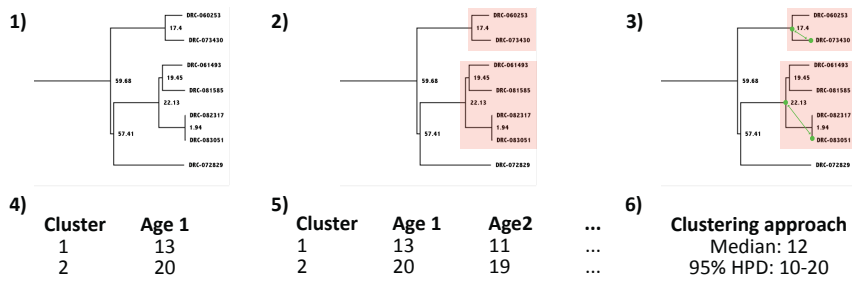

**Supplemental figure 1.** Algorithm for estimating transmission times encompassed by different clustering approaches.

**Step 1:** Extract the tree from the MCMC sampled step.

**Step 2:** Map the clusters on the tree.

**Step 3:** Get the time difference between the ancestral node (most recent common ancestor) and the youngest (furthest from the ancestor) sampled tip in each cluster. These are defined as the age of each cluster.

**Step 4:** Aggregate all these ages across clusters.

**Step 5:** Repeat for every tree calculated in each MCMC sampled step.

**Step 6:** Calculate the median and 95% HDP based on all the ages of all clusters in all MCMC steps for the given clustering approach.

### Supplemental references

1. Scott AN, Menzies D, Tannenbaum T-N, Thibert L, Kozak R, Joseph L, et al. Sensitivities and specificities of spoligotyping and mycobacterial interspersed repetitive unit-variable-number tandem repeat typing methods for studying molecular epidemiology of tuberculosis. *J Clin Microbiol.* 2005 Jan;43(1):89–94.
2. Driscoll JR. Spoligotyping for Molecular Epidemiology of the Mycobacterium tuberculosis Complex. In: *Methods in molecular biology* (Clifton, NJ). 2009. p. 117–28.
3. Kozlov A. RAxML-NG. 2017.
4. Lewis PO. A likelihood approach to estimating phylogeny from discrete morphological character data. *Syst Biol.* 2001;50(6):913–25.
5. Leaché AD, Banbury BL, Felsenstein J, de Oca A nieto-M, Stamatakis A, K. S, et al. Short Tree, Long Tree, Right Tree, Wrong Tree: New Acquisition Bias Corrections for Inferring SNP Phylogenies. *Syst Biol.* 2015 Nov;64(6):1032–47.
6. Kobert K, Stamatakis A, Flouri T. Efficient Detection of Repeating Sites to Accelerate Phylogenetic Likelihood Calculations. *Syst Biol.* 2016 Aug 29;66(2):syw075.
7. Asnicar F, Weingart G, Tickle TL, Huttenhower C, Segata N. Compact graphical representation of phylogenetic data and metadata with GraPhlAn. *PeerJ.* 2015 Jun 18;3:e1029.
8. Coll F, McNerney R, Guerra-Assunção JA, Glynn JR, Perdigão J, Viveiros M, et al. A robust SNP barcode for typing Mycobacterium tuberculosis complex strains. *Nat Commun.* 2014 Jan 1;5:4812.
